# Supplementary material
Source: HighWire-hosted journal article supplement (https://bmjopen.bmj.com/content/7/3/e013417)
Supplement: inline-supplementary-material-1 [file inline-supplementary-material-1.pdf]

This record has been saved.

**Click here to add another PBA assessment (<https://www.iscp.ac.uk/forms/pba.aspx>)**

### **Procedure name**

Carotid Endarterectomy (standard  $\pm$  patch/shunt) [Vascular Surgery]

## About the assessment

### **Trainee**

Shalhoub, Joseph (Mr) [GMC: 6103053]

### **Assessment date**

### **Rater**

### **Hospital**

## Rater feedback

Verbal and written feedback is a mandatory component of this assessment. Please use this space to record areas of strength and suggestions for development which were highlighted during discussion with the trainee.

### **General**

**Strengths**

**Development needs**

**Recommended actions**

Trainee feedback

**Trainee comments**

Trainee reflections

## Trainee reflections on this activity

Please select

### What did I learn from this experience?

### What did I do well?

### What do I need to improve or change? How will I achieve it?

This relates to a  
reflective journal entry

☐

## Ratings

Your ratings should be judged against the standard for the Certification. Assessors are normally consultants (senior trainees may be assessors depending upon their training level and the complexity of the procedure) IMPORTANT: The trainee should explain what he/she intends to do throughout the procedure. The Assessor should provide verbal prompts if required, and intervene if patient safety is at risk. A rating of Satisfactory can only be given if no prompting or intervention was required

## Pre-operative planning (WHO Checklist: Sign In)

Comments about this section

Pre-operative preparation (WHO Checklist: Time Out)

Comments about this section

Exposure and closure

Comments about this section

Intra-operative technique: global (G) and task-specific items (T)

Comments about this section

Post-operative management (WHO Checklist: Sign Out)

Comments about this section

PBA Details

Emergency/Elective

Please select

Difficulty of procedure on this occasion

Please select

### Performed in a simulated setting

No

### PBA performed while on a course

No

## Global summary

### Global summary

Please select

## 0 Topics selected

No topics have been selected

## Saving and validating this assessment

### Submit this PBA

No - Save as draft

PBA created on 11 Oct 2016 by Shalhoub, Joseph (Mr) [GMC: 6103053]

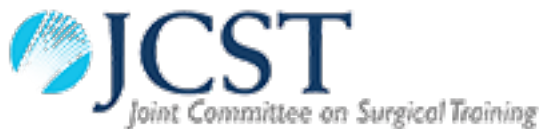

(<http://www.jcst.org/>) The JCST is the parent body for the ISCP
