# Supplementary material
Source: HighWire-hosted journal article supplement (https://bmjopen.bmj.com/content/7/3/e013417)
Supplement: inline-supplementary-material-2 [file inline-supplementary-material-2.pdf]

**Supplementary Table 1: COREQ checklist**

|                                                                                                                                                                                                      |                                                                                                                                                                                                                                                                                               |                                            |
|------------------------------------------------------------------------------------------------------------------------------------------------------------------------------------------------------|-----------------------------------------------------------------------------------------------------------------------------------------------------------------------------------------------------------------------------------------------------------------------------------------------|--------------------------------------------|
| <b>Domain 1: Research team and reflexivity</b>                                                                                                                                                       |                                                                                                                                                                                                                                                                                               | Location in manuscript (Section, page no.) |
| <b>Personal Characteristics</b>                                                                                                                                                                      |                                                                                                                                                                                                                                                                                               |                                            |
| 1. Interviewer/facilitator Which author/s conducted the interview or focus group?                                                                                                                    | JS                                                                                                                                                                                                                                                                                            | Methods - 4                                |
| 2. Credentials<br>What were the researcher's credentials? E.g. PhD, MD                                                                                                                               | BSc MBBS MRCS FHEA PhD                                                                                                                                                                                                                                                                        | Title page - 1                             |
| 3. Occupation<br>What was their occupation at the time of the study?                                                                                                                                 | Specialty Registrar & Honorary Clinical Lecturer in Surgery                                                                                                                                                                                                                                   | Methods 4                                  |
| 4. Gender Was the researcher male or female?                                                                                                                                                         | Male                                                                                                                                                                                                                                                                                          | -                                          |
| 5. Experience and training<br>What experience or training did the researcher have?                                                                                                                   | At the time of the interviews, was in the late stages of completing MEd where principles of qualitative research were covered in detail.                                                                                                                                                      | -                                          |
| <b>Relationship with participants</b>                                                                                                                                                                |                                                                                                                                                                                                                                                                                               |                                            |
| 6. Relationship established<br>Was a relationship established prior to study commencement?                                                                                                           | Yes                                                                                                                                                                                                                                                                                           | -                                          |
| 7. Participant knowledge of the interviewer<br>What did the participants know about the researcher? e.g. personal goals, reasons for doing the research                                              | Participants were briefed on the purpose of the study and understood that it was a research project for JS MEd. Educational ethical approval had been granted, participants reviewed the participant information documentation prior to giving their written informed consent to be involved. | -                                          |
| 8. Interviewer characteristics What characteristics were reported about the interviewer/facilitator? e.g. Bias, assumptions, reasons and interests in the research topic                             | JS is a surgical trainee which was a potential source of bias. No other interviewer-related biases identified.                                                                                                                                                                                | Discussion - 11                            |
| <b>Domain 2: study design</b>                                                                                                                                                                        |                                                                                                                                                                                                                                                                                               |                                            |
| <b>Theoretical framework</b>                                                                                                                                                                         |                                                                                                                                                                                                                                                                                               |                                            |
| 9. Methodological orientation and Theory<br>What methodological orientation was stated to underpin the study? e.g. grounded theory, discourse analysis, ethnography, phenomenology, content analysis | Open and axial coding with thematic content analysis.                                                                                                                                                                                                                                         | Methods – 4-5                              |
| <b>Participant selection</b>                                                                                                                                                                         |                                                                                                                                                                                                                                                                                               |                                            |
| 10. Sampling How were participants selected? e.g.                                                                                                                                                    | Recruited via email                                                                                                                                                                                                                                                                           | Methods - 4                                |

|                                                                                                                |                                                                                                                                                                                                                                             |             |
|----------------------------------------------------------------------------------------------------------------|---------------------------------------------------------------------------------------------------------------------------------------------------------------------------------------------------------------------------------------------|-------------|
| purposive, convenience, consecutive, snowball                                                                  | using surgical trainee mailing lists. The first ten respondents were subsequently invited for a semi-structured interview.                                                                                                                  |             |
| 11. Method of approach How were participants approached? e.g. face-to-face, telephone, mail, email             | Email                                                                                                                                                                                                                                       | Methods - 4 |
| 12. Sample size How many participants were in the study?                                                       | Ten                                                                                                                                                                                                                                         | Results - 5 |
| 13. Non-participation How many people refused to participate or dropped out? Reasons?                          | Of the first ten respondents that were invited for a semi-structured interview, all gave informed consent and completed the interview. There were no participants who subsequently refused to participate, withdrew consent or dropped out. | -           |
| <b>Setting</b>                                                                                                 |                                                                                                                                                                                                                                             |             |
| 14. Setting of data collection<br>Where was the data collected? e.g. home, clinic, workplace                   | Data was collected via Skype or in non-clinical professional location e.g. meeting room in a conference centre or university.                                                                                                               | -           |
| 15. Presence of non-participants<br>Was anyone else present besides the participants and researchers?          | No                                                                                                                                                                                                                                          | -           |
| 16. Description of sample<br>What are the important characteristics of the sample? e.g. demographic data, date | Age range 29-36; 6 males, 4 females. Level of training ranged from Core-trainee year 2 to Specialty trainee year 7. Data was collected between 20 <sup>th</sup> March 2014 and 27 <sup>th</sup> April 2014                                  | Table 1     |
| <b>Data collection</b>                                                                                         |                                                                                                                                                                                                                                             |             |
| 17. Interview guide Were questions, prompts, guides provided by the authors? Was it pilot tested?              | Interviews were semi-structured using a schedule (Figure 1); follow up questions were allowed. Participants were also asked to bring two procedure based assessment they considered favourable and two                                      | Methods - 4 |

|                                                                                                                                                            |                                                                                                                                                          |                |
|------------------------------------------------------------------------------------------------------------------------------------------------------------|----------------------------------------------------------------------------------------------------------------------------------------------------------|----------------|
|                                                                                                                                                            | they considered unfavourable to be used as prompts.                                                                                                      |                |
| 18. Repeat interviews<br>Were repeat interviews carried out? If yes, how many?                                                                             | No                                                                                                                                                       | -              |
| 19. Audio/visual recording<br>Did the research use audio or visual recording to collect the data?                                                          | The semi-structured interviews were audio recorded using a laptop. This allowed audio recording of face-to-face and Skype interviews by the same method. | -              |
| 20. Field notes<br>Were field notes made during and/or after the interview or focus group?                                                                 | No additional field notes were made.                                                                                                                     | -              |
| 21. Duration What was the duration of the interviews or focus group?                                                                                       | The semi-structured interview durations ranged from 13:45 to 59:29 (minutes : seconds)                                                                   | Table 1        |
| 22. Data saturation<br>Was data saturation discussed?                                                                                                      | No                                                                                                                                                       | -              |
| 23. Transcripts returned Were transcripts returned to participants for comment and/or correction?                                                          | No                                                                                                                                                       | -              |
| <b>Domain 3: analysis and findings</b>                                                                                                                     |                                                                                                                                                          |                |
| <b>Data analysis</b>                                                                                                                                       |                                                                                                                                                          |                |
| 24. Number of data coders<br>How many data coders coded the data?                                                                                          | One                                                                                                                                                      | -              |
| 25. Description of the coding tree<br>Did authors provide a description of the coding tree?                                                                | Open and axial coding. Coding described in methods section.                                                                                              | Methods - 4    |
| 26. Derivation of themes<br>Were themes identified in advance or derived from the data?                                                                    | Themes were derived from the data                                                                                                                        | Methods – 4-5  |
| 27. Software What software, if applicable, was used to manage the data?                                                                                    | Microsoft Word and Excel                                                                                                                                 | -              |
| 28. Participant checking<br>Did participants provide feedback on the findings?                                                                             | No                                                                                                                                                       | -              |
| <b>Reporting</b>                                                                                                                                           |                                                                                                                                                          |                |
| 29. Quotations presented Were participant quotations presented to illustrate the themes / findings? Was each quotation identified? e.g. participant number | Yes, specific comments were supported with direct quotes attributed to anonymised participant by stage of training and surgical specialty                | Results – 5-11 |
| 30. Data and findings consistent<br>Was there consistency between the data presented and the findings?                                                     | Yes                                                                                                                                                      | -              |
| 31. Clarity of major themes<br>Were major themes clearly presented in the findings?                                                                        | Yes                                                                                                                                                      | -              |
| 32. Clarity of minor themes                                                                                                                                | Minor themes are                                                                                                                                         | Supplementary  |

|                                                                        |                                                                                                             |           |
|------------------------------------------------------------------------|-------------------------------------------------------------------------------------------------------------|-----------|
| Is there a description of diverse cases or discussion of minor themes? | discussed in the manuscript and reported in full in the supplementary material accompanying the manuscript. | materials |
|------------------------------------------------------------------------|-------------------------------------------------------------------------------------------------------------|-----------|
