# Supplementary material
Source: HighWire-hosted journal article supplement (https://bmjopen.bmj.com/content/7/3/e013417)
Supplement: inline-supplementary-material-3 [file inline-supplementary-material-3.pdf]

**Supplementary Table:** Summary of the themes which emerged from the semi-structured interviews

| Themes                                                    | Participant 1 | Participant 2 | Participant 3 | Participant 4 | Participant 5 | Participant 6 | Participant 7 | Participant 8 | Participant 9 | Participant 10 | Total |
|-----------------------------------------------------------|---------------|---------------|---------------|---------------|---------------|---------------|---------------|---------------|---------------|----------------|-------|
| <b>Use of PBAS to derive education value</b>              |               |               |               |               |               |               |               |               |               |                |       |
| Questionable Educational value                            | X             | X             | X             | X             | X             | X             | X             | X             | X             | X              | 10    |
| Form filling / tick box exercise                          | X             | X             | X             | X             | X             | X             | X             | X             | X             | X              | 10    |
| Can be used well / provide benefit                        | X             | X             |               | X             | X             | X             | X             | X             | X             |                | 8     |
| Generates training                                        |               |               | X             | X             | X             | X             | X             | X             |               | X              | 7     |
| Fit for purpose? / specificity required                   | X             |               | X             |               | X             |               | X             | X             |               | X              | 6     |
| Formalisation of training                                 | X             |               |               | X             | X             | X             | X             |               |               |                | 5     |
| Quality of assessment?                                    | X             | X             | X             |               |               | X             |               |               |               | X              | 5     |
| Improved confidence                                       | X             | X             |               | X             |               |               | X             |               |               |                | 4     |
| Holistic assessment / technical and non-technical         | X             | X             |               |               |               |               |               |               |               | X              | 3     |
| Learning non-technical skills                             | X             | X             |               |               |               |               |               |               |               |                | 2     |
| Increased worth with increased complexity                 | X             |               | X             |               | X             |               |               |               |               |                | 3     |
| Not level of training specific                            | X             |               |               |               |               | X             |               |               |               | X              | 3     |
| Too focused on basic competencies                         |               |               |               | X             |               |               |               |               |               |                | 1     |
| Examination of thought process                            | X             |               |               |               |               |               |               |               | X             |                | 1     |
| Need to review and generate targets based on previous PBA |               |               | X             |               |               |               |               |               |               |                | 1     |
| Insufficient feedback / need for feedback                 |               |               | X             |               |               | X             | X             |               | X             | X              | 5     |
| Superfluous content / too generic                         | X             |               | X             | X             | X             |               |               |               |               | X              | 5     |
| Insufficient discussion                                   | X             |               | X             |               | X             | X             |               |               |               |                | 4     |
| Expand PBA repertoire                                     | X             | X             |               |               |               | X             |               |               |               |                | 3     |
| Takes away from other elements of training                | X             |               |               |               |               | X             |               |               |               |                | 2     |

|                                                         |   |   |   |   |   |   |   |   |   |   |    |
|---------------------------------------------------------|---|---|---|---|---|---|---|---|---|---|----|
| Learning from mistakes                                  | X |   |   |   |   |   |   |   |   |   | 1  |
| Facilitates identification of good trainers             |   | X |   |   |   |   |   |   |   |   | 1  |
| Value of documenting progression                        |   | X |   | X | X | X | X | X |   |   | 6  |
| Focusing of training / identify areas for development   | X |   | X | X |   |   | X | X | X |   | 6  |
| Not valid                                               | X |   |   | X | X | X |   |   | X |   | 5  |
| Improved the quality of feedback                        |   |   |   | X | X |   | X | X |   |   | 4  |
| Exploratory questioning                                 | X |   |   |   |   |   |   |   |   |   | 1  |
|                                                         |   |   |   |   |   |   |   |   |   |   |    |
| <b>Use of PBAs for Assessment</b>                       |   |   |   |   |   |   |   |   |   |   |    |
| Form filling / tick box exercise                        | X | X | X | X | X | X | X | X | X | X | 10 |
| Numbers required                                        | X | X | X | X |   | X | X | X | X | X | 9  |
| Obstruction from seniors / lack of support / engagement |   | X | X |   | X | X | X | X | X | X | 8  |
| Timing of assessment (retrospective or prospective)     | X |   | X | X |   | X | X |   |   | X | 6  |
| Use as summative tool (for/against)                     |   |   |   |   | X | X | X |   | X | X | 5  |
| (Over)simplification of assessment process              | X |   |   |   | X |   | X |   |   | X | 4  |
| Trainees fill own forms                                 | X |   | X |   | X | X |   |   |   | X | 5  |
| Trainees misleading trainers                            | X |   |   |   | X | X | X |   |   |   | 4  |
| Formative?                                              | X | X |   |   | X |   | X |   |   |   | 4  |
| Additional hurdle                                       | X |   |   | X |   |   |   | X |   |   | 3  |
| Expand PBA repertoire                                   | X | X |   |   |   | X |   |   |   |   | 3  |
| Not level of training specific                          | X |   |   |   |   | X |   |   |   | X | 3  |
| Variation in use                                        | X | X |   | X |   |   |   |   |   |   | 3  |
| Identify trainees in trouble?                           |   |   |   |   | X | X |   |   |   |   | 2  |
| Unrealistic expectations of ability                     |   |   |   |   |   |   |   |   |   | X | 1  |
| Too focused on basic competencies                       |   |   |   | X |   |   |   |   |   |   | 1  |
| Need for greater evidence base                          |   |   |   |   | X |   |   |   |   |   | 1  |
| Examination of thought process                          | X |   |   |   |   |   |   |   | X |   | 1  |
| Sign off = competent?                                   |   |   |   | X |   |   |   |   |   |   | 1  |
| Limited / No review of free text responses by assessors | X | X | X | X | X | X | X | X | X | X | 10 |
| Structured assessment                                   | X |   |   | X | X |   | X | X | X | X | 7  |



|                                                               |   |   |   |   |   |   |   |   |   |   |    |
|---------------------------------------------------------------|---|---|---|---|---|---|---|---|---|---|----|
| technical                                                     |   |   |   |   |   |   |   |   |   |   |    |
| Learning non-technical skills                                 | X | X |   |   |   |   |   |   |   |   | 2  |
| Develop rapport with trainers                                 |   | X |   |   |   |   |   |   |   |   | 1  |
| Facilitates identification of good trainers                   |   | X |   |   |   |   |   |   |   |   | 1  |
| Identify trainees in trouble?                                 |   |   |   |   | X | X |   |   |   |   | 2  |
| Learning from mistakes                                        | X |   |   |   |   |   |   |   |   |   | 1  |
| Positive feelings                                             |   | X |   |   |   |   |   |   |   |   | 1  |
|                                                               |   |   |   |   |   |   |   |   |   |   |    |
| <b>Limitations and areas for Improvement</b>                  |   |   |   |   |   |   |   |   |   |   |    |
| Educational value?                                            | X | X | X | X | X | X | X | X | X | X | 10 |
| Form filling / tick box exercise                              | X | X | X | X | X | X | X | X | X | X | 10 |
| Limited / No review of free text responses by assessors       | X | X | X | X | X | X | X | X | X | X | 10 |
| Time consuming / hassle                                       | X | X | X | X | X | X | X | X | X | X | 10 |
| Trainer dependent                                             | X | X | X | X | X | X | X | X | X | X | 10 |
| Numbers required                                              | X | X | X | X |   | X | X | X | X | X | 9  |
| Obstruction from seniors / lack of support / engagement       |   | X | X |   | X | X | X | X | X | X | 8  |
| Stressful                                                     | X | X | X | X |   | X | X | X | X |   | 8  |
| Value of documenting progression                              |   | X |   | X | X | X | X | X |   |   | 6  |
| Apologetic stance                                             | X | X |   |   | X | X | X |   |   |   | 5  |
| Insufficient feedback / need for feedback                     |   |   | X |   |   | X | X |   | X | X | 5  |
| Need for trainer impetus to do PBAs / dedicated training list | X | X |   |   |   |   |   | X | X | X | 5  |
| Not valid                                                     | X |   |   | X | X | X |   |   | X |   | 5  |
| No safety benefit                                             |   |   |   | X | X |   | X |   | X | X | 5  |
| Superfluous content / too generic                             | X |   | X | X | X |   |   |   |   | X | 5  |
| Trainees fill own forms                                       | X |   | X |   | X | X |   |   |   | X | 5  |
| (Over)simplification of assessment process                    | X |   |   |   | X |   | X |   |   | X | 4  |
| Trainees misleading trainers                                  | X |   |   |   | X | X | X |   |   |   | 4  |
| Being told                                                    | X |   |   | X |   |   |   | X | X |   | 4  |
| Insufficient discussion                                       | X |   | X |   | X | X |   |   |   |   | 4  |
| Additional hurdle                                             | X |   |   | X |   |   |   | X |   |   | 3  |
| Ambiguity                                                     | X |   |   |   | X | X |   |   |   |   | 3  |

|                                                                                                  |   |   |   |   |   |   |   |   |  |   |   |
|--------------------------------------------------------------------------------------------------|---|---|---|---|---|---|---|---|--|---|---|
| Expand PBA repertoire                                                                            | X | X |   |   |   | X |   |   |  |   | 3 |
| Not level of training specific                                                                   | X |   |   |   |   | X |   |   |  | X | 3 |
| Variation in use                                                                                 | X | X |   | X |   |   |   |   |  |   | 3 |
| Takes away from other elements of training                                                       | X |   |   |   |   | X |   |   |  |   | 2 |
| Trainer concentrating on assessment during case                                                  | X |   |   |   |   | X |   |   |  |   | 2 |
| Increasing difficulty with seniority to complete (less supervision) / less useful with seniority |   |   |   |   |   |   | X |   |  | X | 2 |
| Resentment of the process                                                                        |   |   |   | X |   |   |   | X |  |   | 2 |
| Unrealistic expectations of ability                                                              |   |   |   |   |   |   |   |   |  | X | 1 |
| Too focused on basic competencies                                                                |   |   |   | X |   |   |   |   |  |   | 1 |
| Need for greater evidence base                                                                   |   |   |   |   | X |   |   |   |  |   | 1 |
| Deprofessionalisation?                                                                           | X |   |   |   |   |   |   |   |  |   | 1 |
|                                                                                                  |   |   |   |   |   |   |   |   |  |   |   |
| <b>Other</b>                                                                                     |   |   |   |   |   |   |   |   |  |   |   |
| Mixed feelings                                                                                   | X | X | X | X | X |   |   |   |  |   | 5 |
| Culture of training                                                                              | X | X |   |   |   |   |   | X |  |   | 3 |
| Loss of candour                                                                                  | X |   |   |   |   |   |   |   |  |   | 1 |

PBA, procedure-based assessment.
